# Supplementary material
Source: PubMed Central journal article supplement (PMC4396244)
Supplement: ijcep0008-1844-f3.pdf [file ijcep0008-1844-f3.pdf]

## TFPI2 methylation in cervical cancer

**Table S1.** Comparison of *TFPI2* methylation between the four lesion grades in the Uyгур cohort

|   | CpG_1  | CpG_2.3.4.5 | CpG_6 | CpG_12.13.14 | CpG_15  | CpG_16.17 | CpG_18.19  | CpG_20 | CpG_21.22 | CpG_23 | CpG_24.25.26 | CpG_31     |
|---|--------|-------------|-------|--------------|---------|-----------|------------|--------|-----------|--------|--------------|------------|
| F | 3.495  | 1.697       | 2.121 | 1.981        | 4.583   | 1.946     | 6.645      | 3.063  | 2.413     | 2.968  | 3.256        | 8.015      |
| P | 0.019* | 0.184       | 0.105 | 0.124        | 0.005** | 0.133     | < 0.001*** | 0.034* | 0.074     | 0.038* | 0.027*       | < 0.001*** |

Note: Half of the CpG sites have different methylation levels between different lesion grades in Uyгур cohort. Kruskal-Wallis H test was used to analyze the difference. *P* values were obtained from comparisons between the four lesion grades in detecting methylation levels of every CpG sites in Uyгур cohort. \**P* < 0.05, \*\**P* < 0.01, \*\*\**P* < 0.001.

**Table S2.** Comparison of *TFPI2* methylation between the four lesion grades in the Han cohort

|   | CpG_1   | CpG_2.3.4.5 | CpG_6 | CpG_12.13.14 | CpG_15 | CpG_16.17 | CpG_18.19 | CpG_20 | CpG_21.22 | CpG_23 | CpG_24.25.26 | CpG_31 |
|---|---------|-------------|-------|--------------|--------|-----------|-----------|--------|-----------|--------|--------------|--------|
| F | 4.645   | 2.708       | 1.13  | 2.46         | 1.575  | 1.895     | 1.115     | 3.304  | 4.704     | 3.081  | 2.298        | 3.899  |
| P | 0.004** | 0.049*      | 0.34  | 0.067        | 0.2    | 0.135     | 0.347     | 0.023* | 0.004**   | 0.030* | 0.082        | 0.011* |

Note: There is a significant difference in *TFPI2* methylation between the 4 lesion grades at some CpG sites. Kruskal-Wallis H test was used to analyze the difference. *P* values were obtained from comparisons between the four lesion grades in detecting methylation levels of every CpG sites in Han cohort. \**P* < 0.05, \*\**P* < 0.01.

## TFPI2 methylation in cervical cancer

**Table S3.** The difference between the four lesion grades of HPV16 infection in Uygur cohort (n = 123 cases)

| Lesion grades | HPV16 n (%) |            | $\chi^2$ | P          |
|---------------|-------------|------------|----------|------------|
|               | +           | -          |          |            |
| Normal        | 1 (4.8%)    | 20 (95.2%) | 35.748   | < 0.001*** |
| CIN1          | 3 (27.3%)   | 8 (72.7%)  |          |            |
| CIN2/3        | 15 (41.7%)  | 21 (58.3%) |          |            |
| ICC           | 42 (76.4%)  | 13 (23.6%) |          |            |

Note: There is a significant difference in HPV16 infection between the four lesion grades in Uygur cohort. "+" is HPV16-positive infection, "-" is HPV16-negative infection. Chi-square test was used in this analysis. P values were obtained from comparisons between 4 lesion grades in detecting HPV16 infected in Uygur cohort. \*\*\*P < 0.001.

**Table S4.** The difference in HPV16 infection between CIN2/3 and ICC in the Han cohort

| Lesion grades | HPV16 n (%) |            | $\chi^2$ | P     |
|---------------|-------------|------------|----------|-------|
|               | +           | -          |          |       |
| CIN2/3        | 24 (63.2%)  | 14 (36.8%) | 0.338    | 0.561 |
| ICC           | 23 (53.5%)  | 10 (46.5%) |          |       |

Note: There is not a significant difference in HPV16 infection between CIN2/3 and ICC in the Han cohort. Chi-square test was used in this analysis.
